# Supplementary material
Source: PubMed Central journal article supplement (PMC6561148)
Supplement: pnas.1905900116.sapp.pdf [file pnas.1905900116.sapp.pdf]

## Supporting Information Appendix

**Figure S1. Secondary structure predictions from PHYRE (1).** A) *Agrobacterium tumefaciens* protein GPR. B) *Caulobacter crescentus* protein TipN.

A.

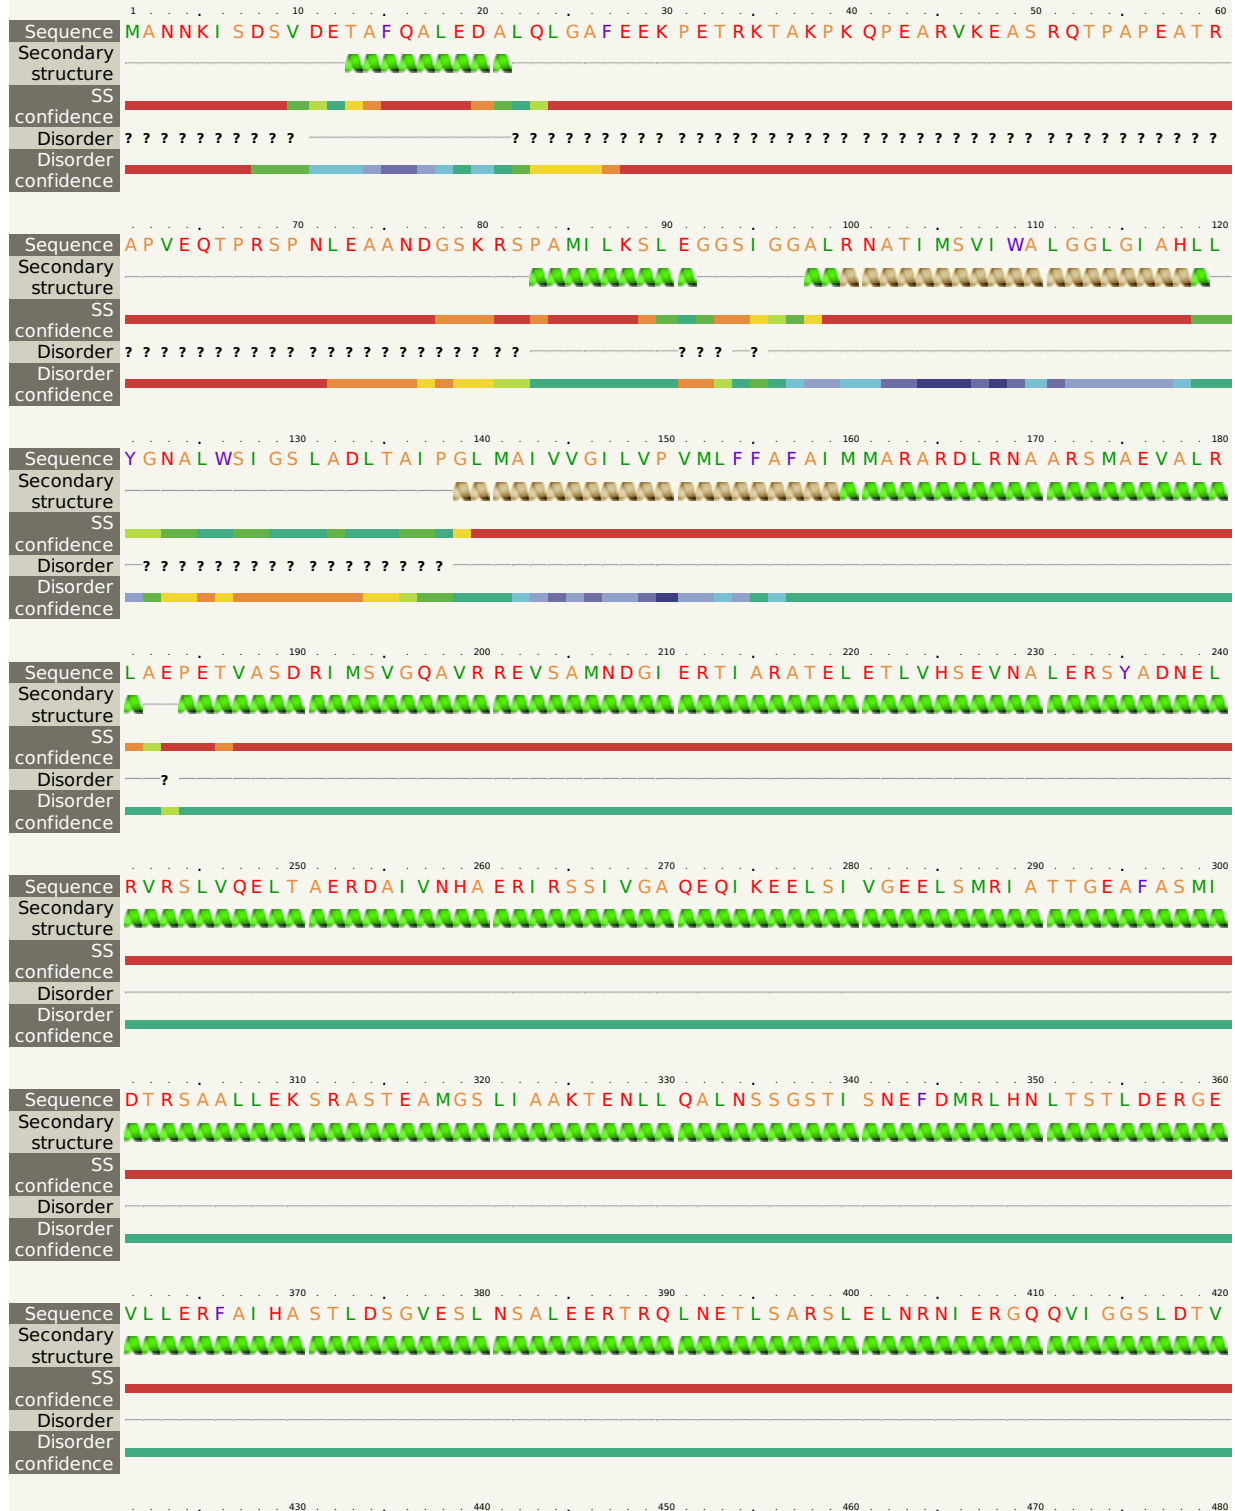

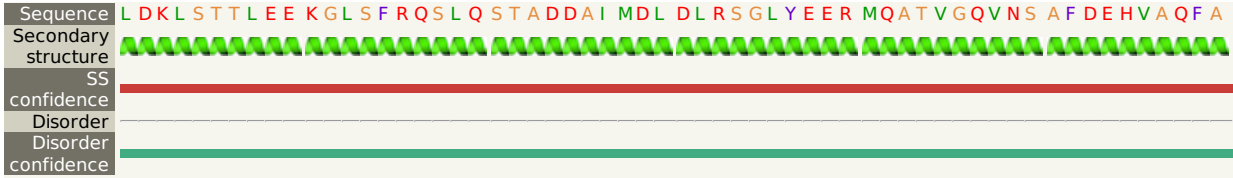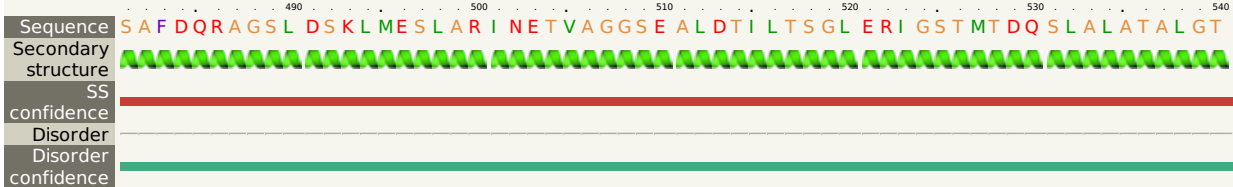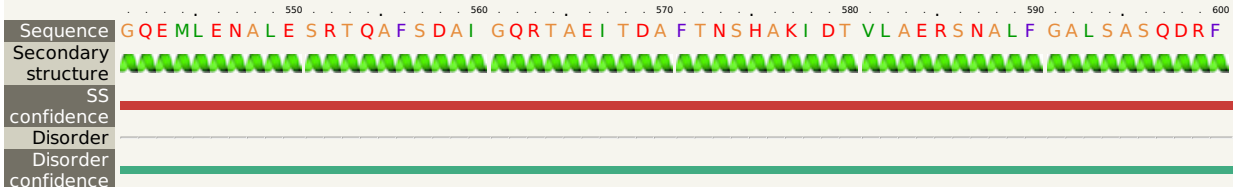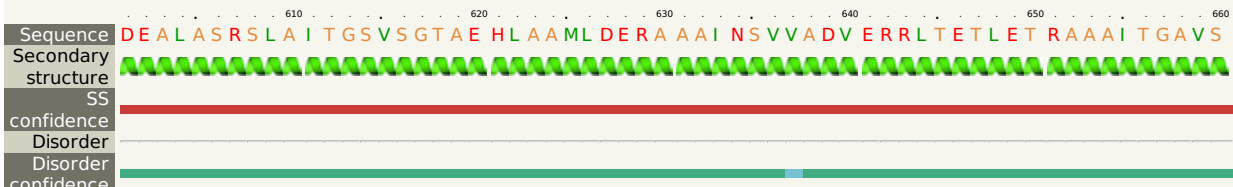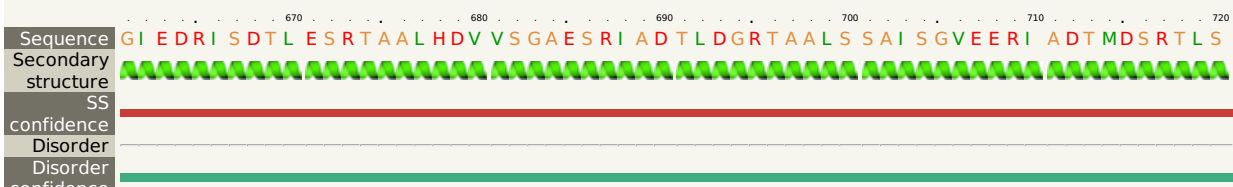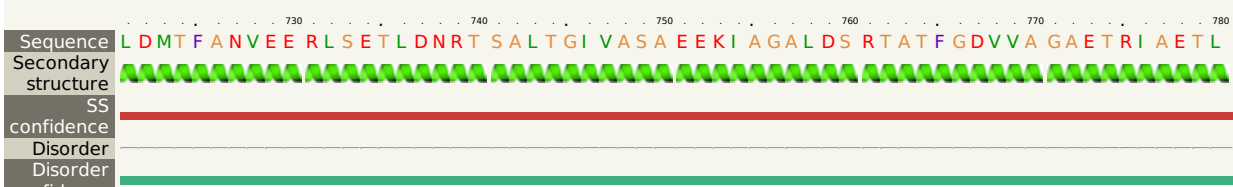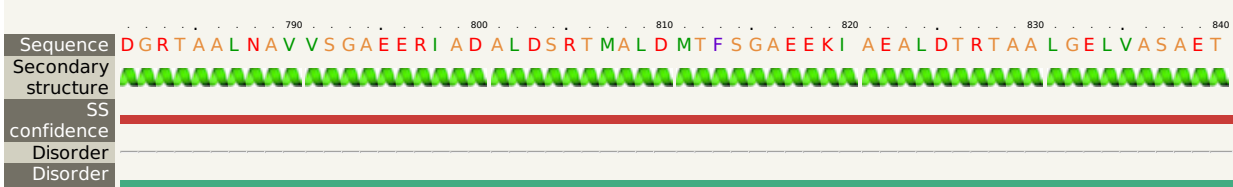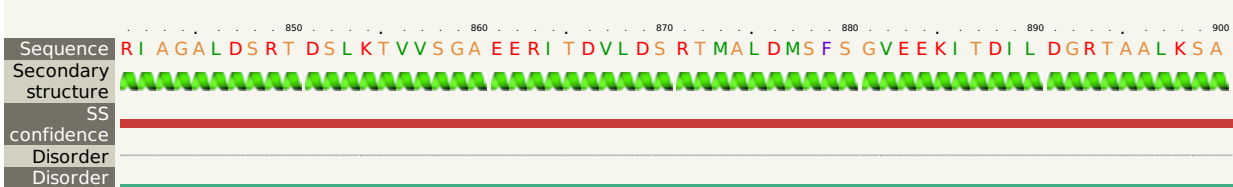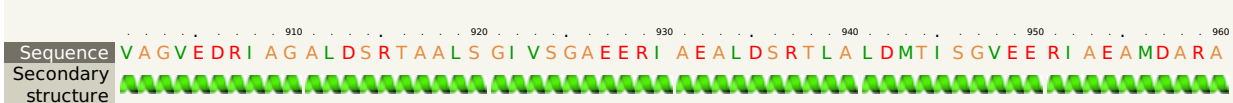

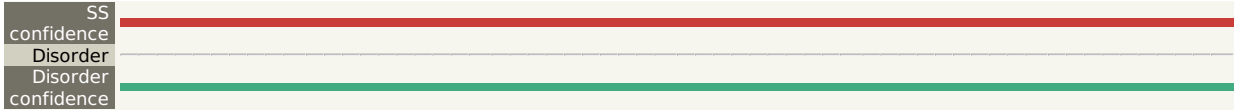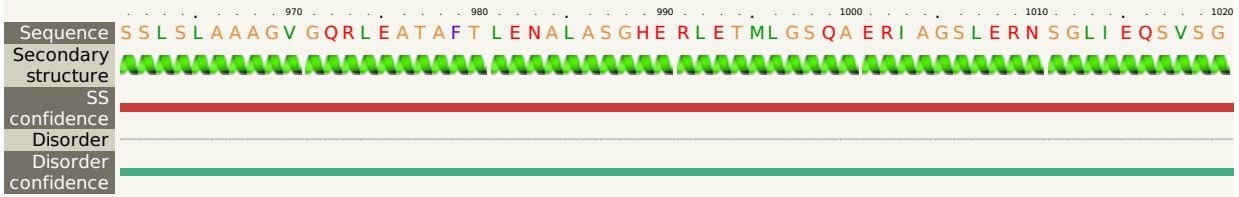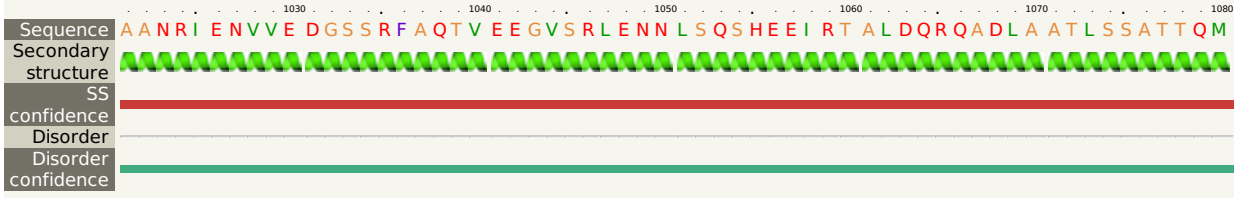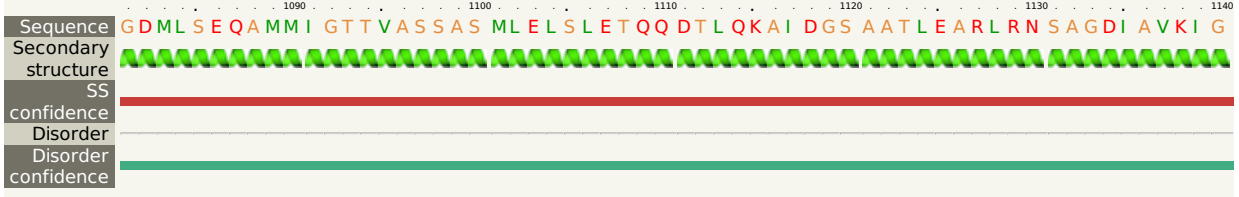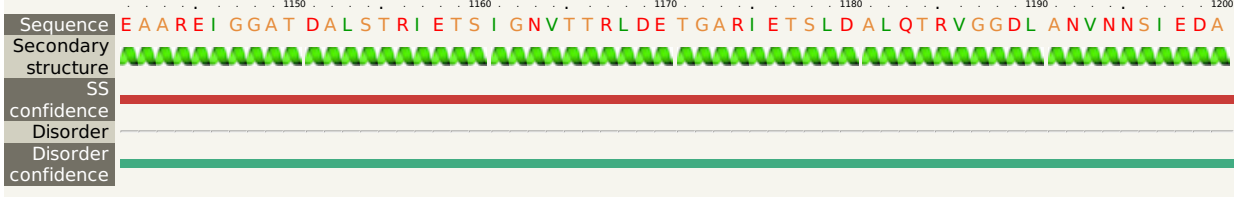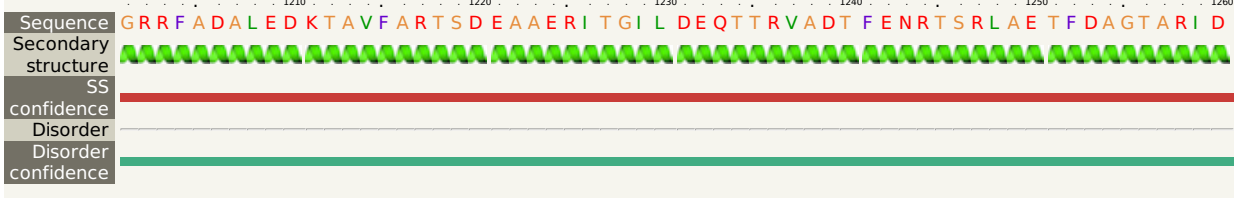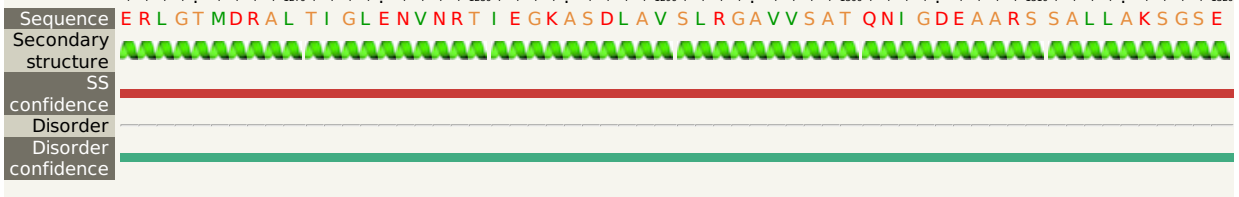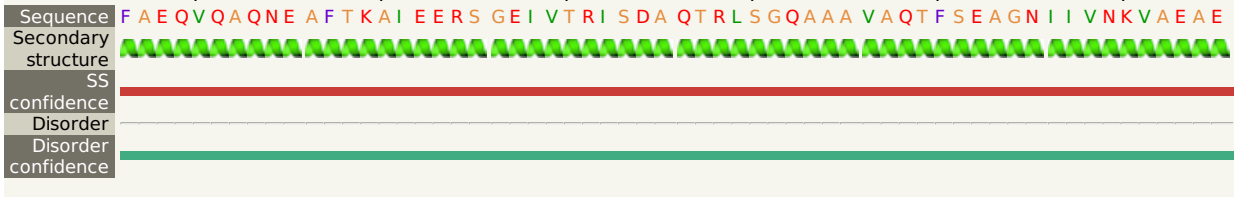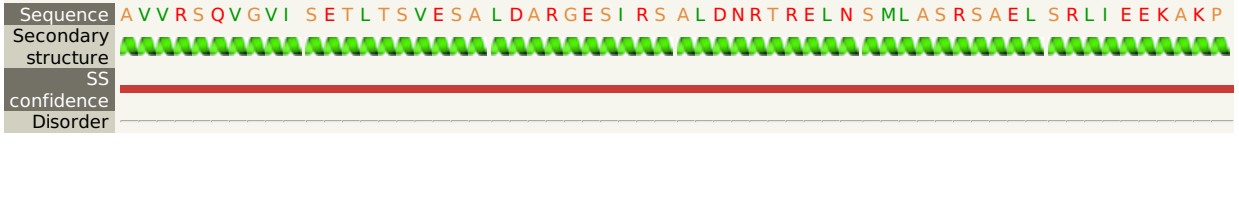

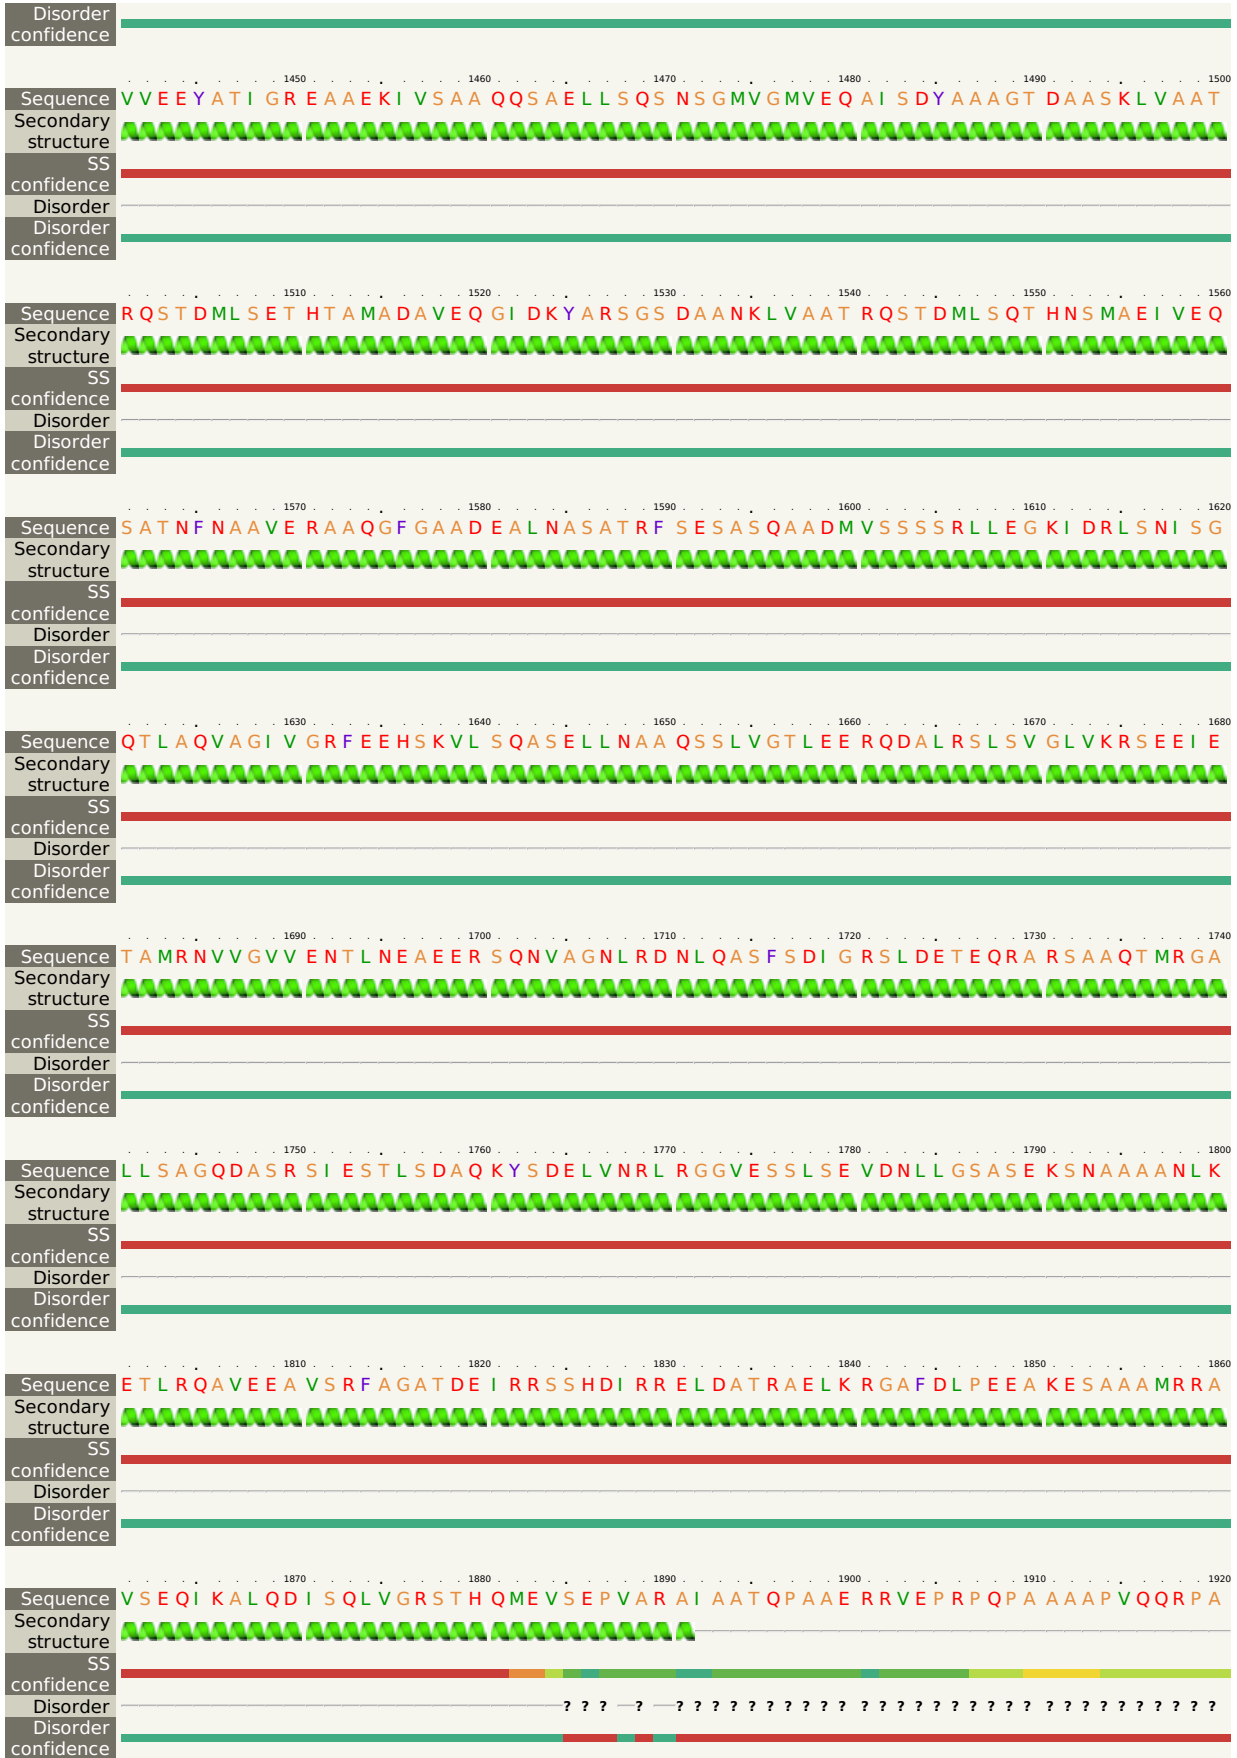

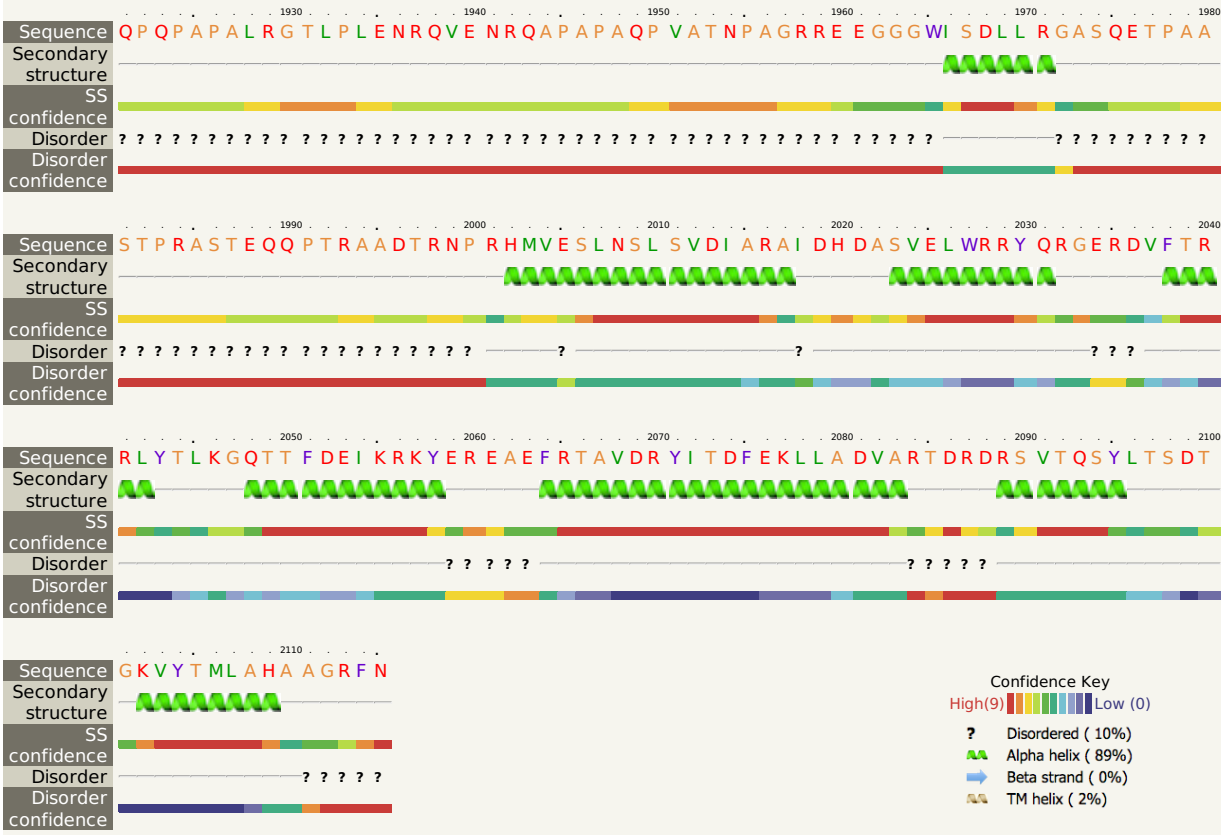

B.

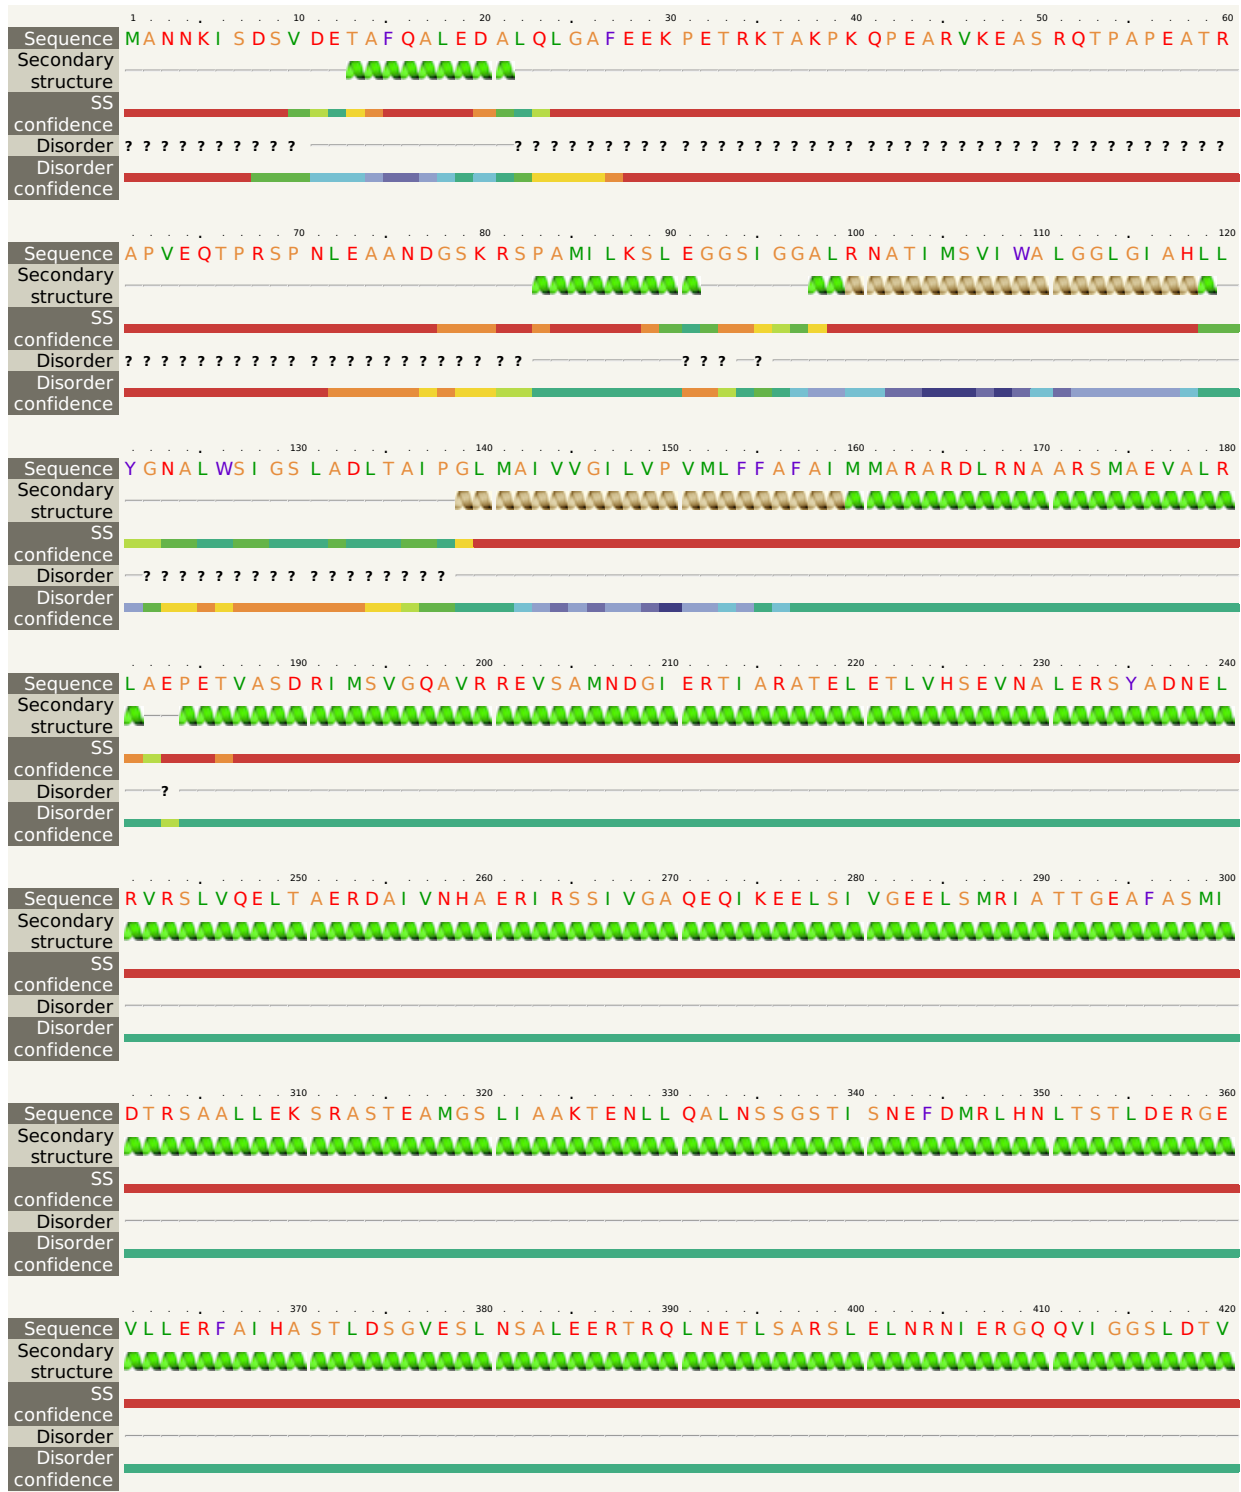

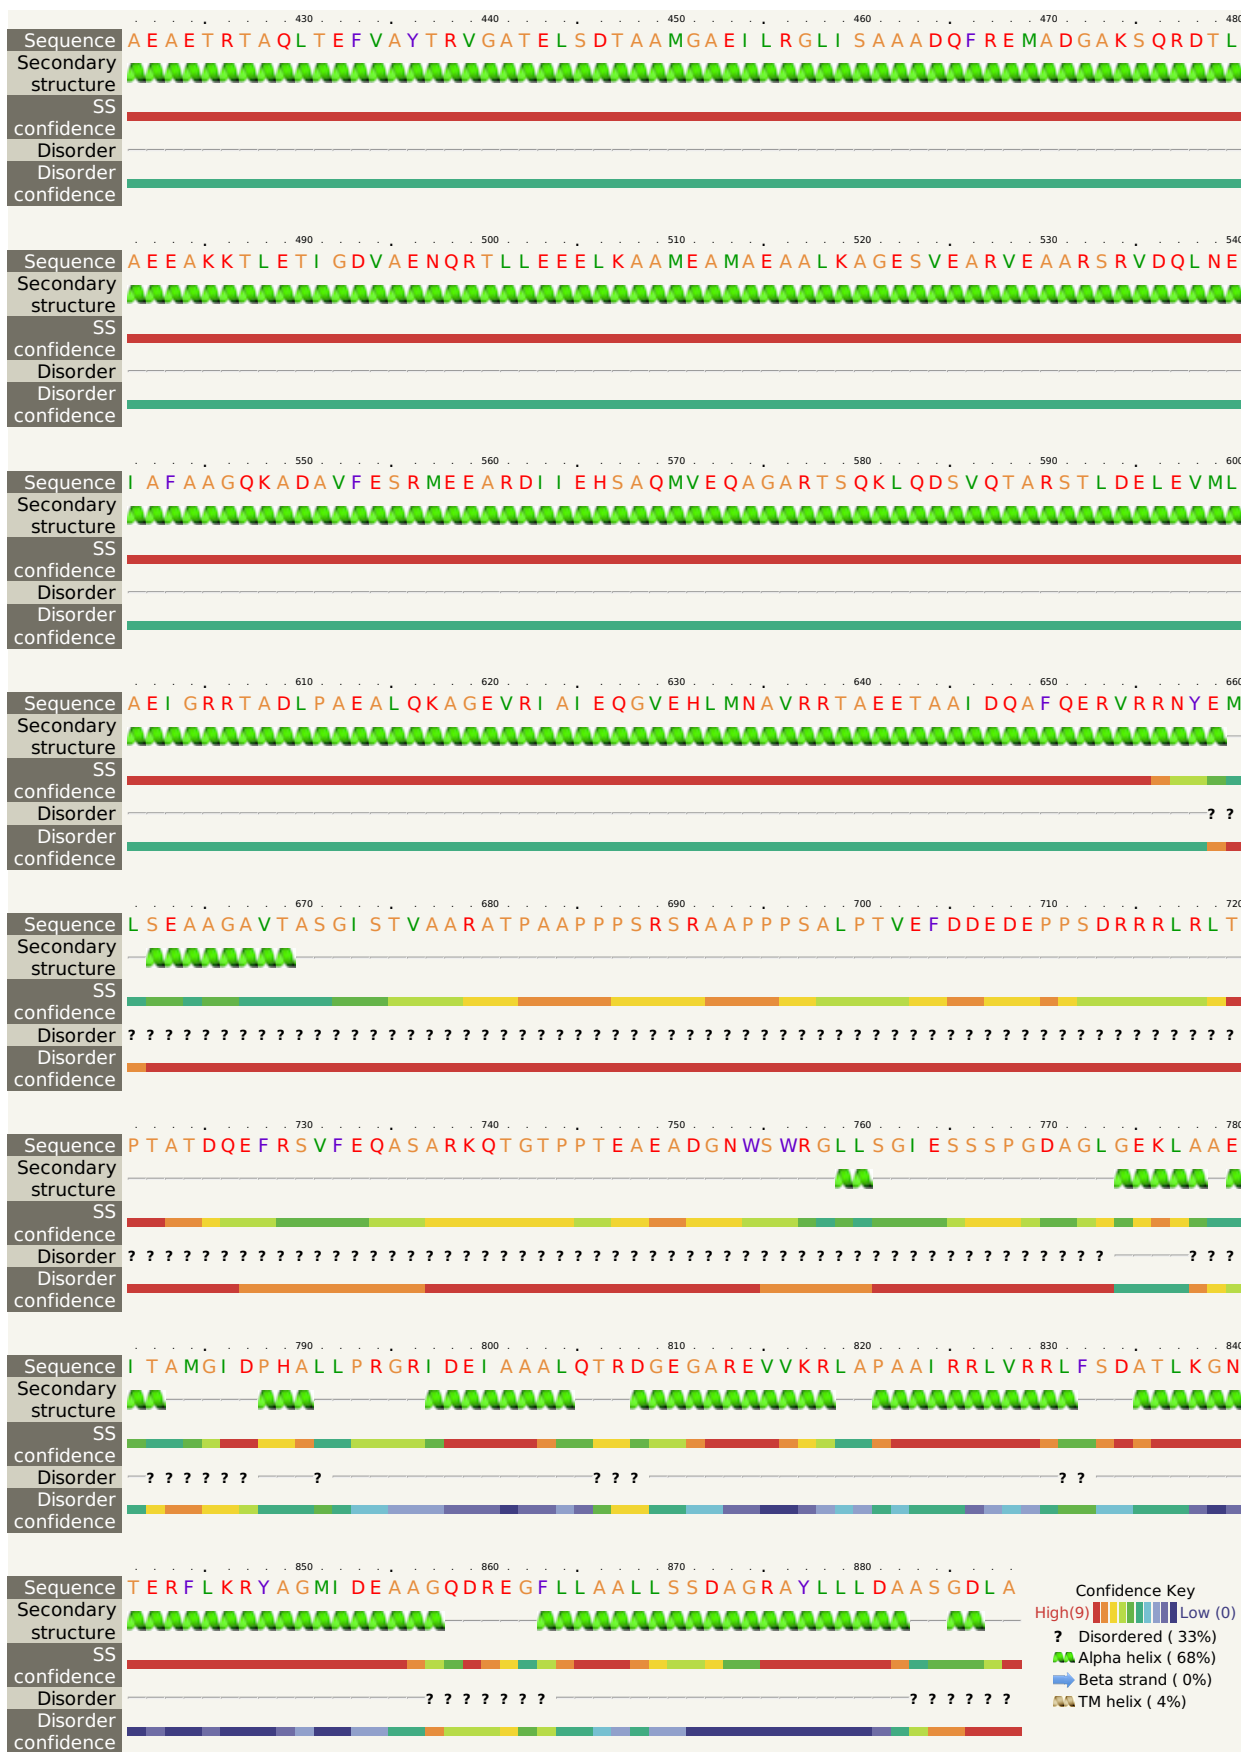

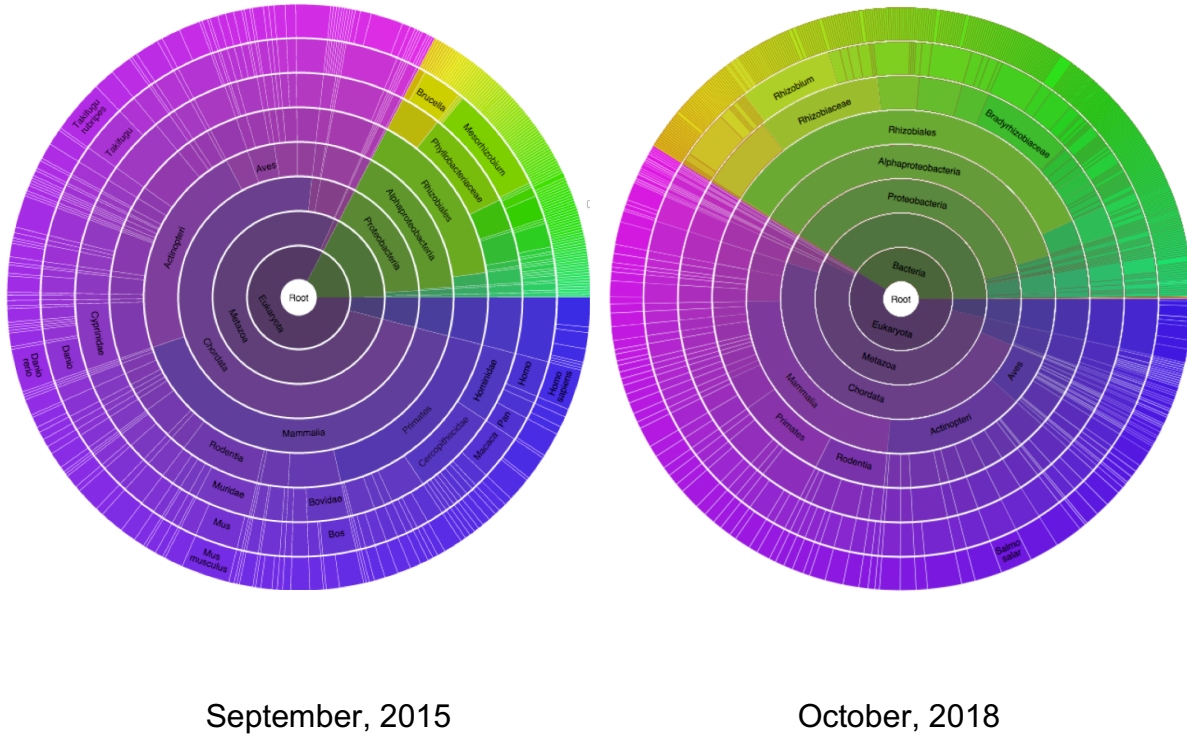

**Figure S2.** Change in species distribution of apolipoproteins (Pfam, PF01442, (2)) between Sept., 2015, and October, 2018.

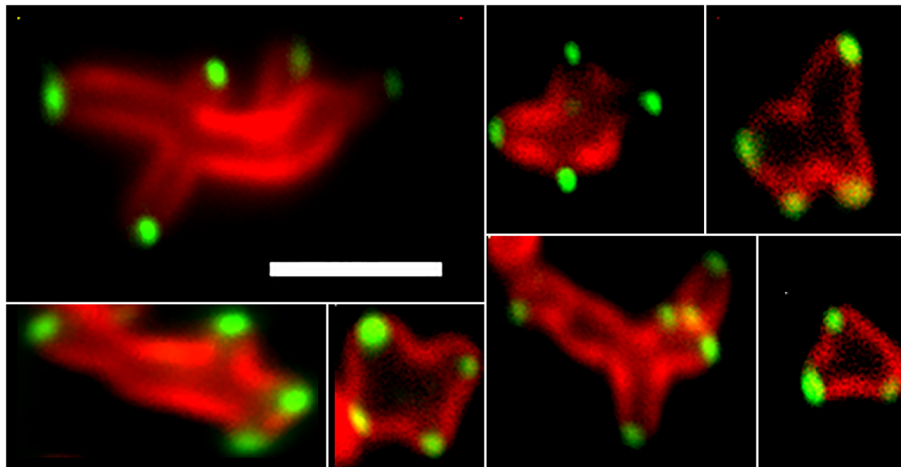

**Figure S3.** Expression of GPR-GFP *in trans* to WT GPR results in formation of ectopic poles. Cells are counterstained with FM4-64. Scale bar = 3 $\mu$ m.



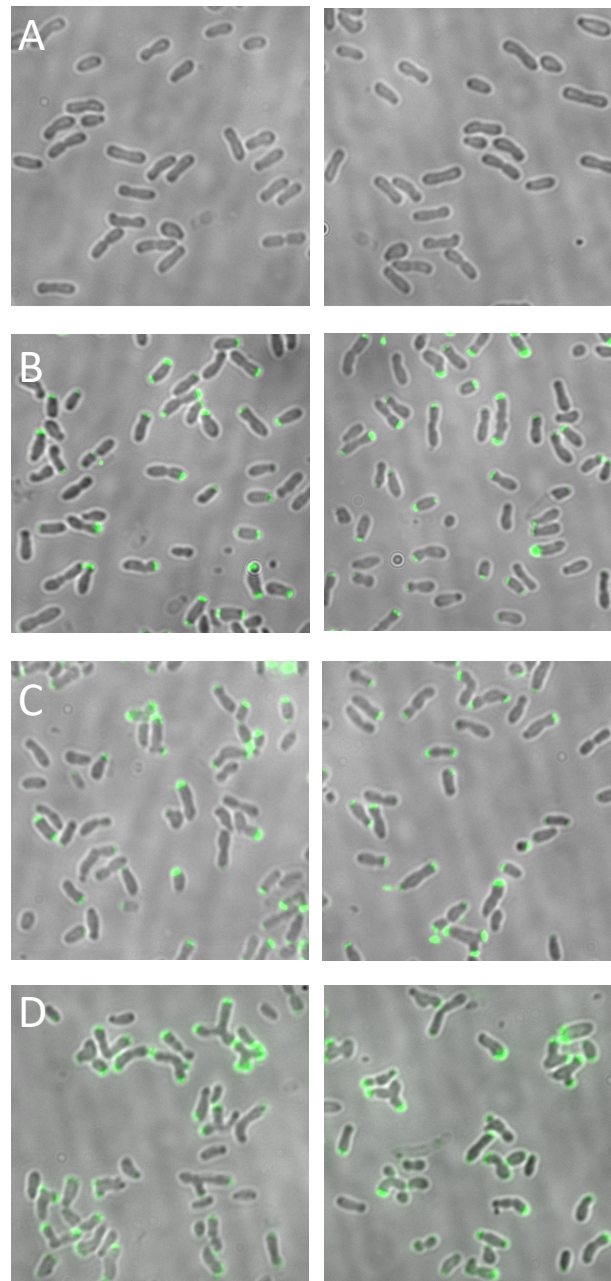

**Figure S4. Induction of GFP-GPR in WT *Agrobacterium tumefaciens* with increasing concentrations of IPTG.** Ectopic poles are formed at higher concentrations of IPTG. Cells were grown for 24 hours prior to imaging in the IPTG concentration indicated. A) 0mM IPTG, B) 0.25mM IPTG, C) 0.5mM IPTG, D) 1.0mM IPTG.

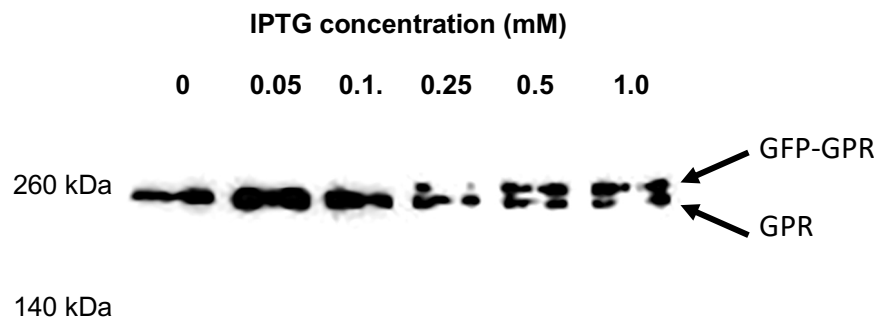

**Figure S5. Western blot to detect WT GPR or GFP-GPR.** Different concentrations of IPTG were used to induce GPR-GFP expression, cell extracts were separated by SDS-gel electrophoresis, and GPR was detected following Western blotting using antibodies to GPR.

TGCTGACCGCAGGTGCGCCGCGTAATTATCGGGAGCTTCGAAAACAATACTGACCGCTGCCAT  
GGCTGGAATCCTGTCTCGCCGTTTCTGTTCATGTCACATATGTGTCTGATTACGCATGCTG  
GCGGCTGCTATCGGCTTAAATTACGGCGTGACGCAGGCGAAAATCTTCTGCTATGGTTAATTTA  
TGTTAAACTTATGCGAAACAAGGCGTTCAGCGTGAAACTCAGGTTTAAAAACTGTTAAAAAGCC  
GACACTTCGCTGCCGTGCAAATCCGCTAAATGTGTCACTACGGTACTGCCGTTCTCGCAGGGC  
TTAAGCTCAAGCTTTGTTATTGCGGCACAGTGATGTAATTTGCCCCGAAAGCTGGACCACCAGC  
AATTCGGGATTTGGTAAGTGGCGGAACTGCTCTCTCTTGAGGGAAAGTTTCGTTGGCATGATGG  
CGGCAGTCCGCTTGCTGATCGCAAGTGGGTCAACGGCATGAAGCCGGGCGTATGTGTAACGAGG  
CGTAACCGCATGGCGAATAACAAGATCAGCGACTCTGTGACGAGACTGCATTTACAGCATTGG  
AAGATGCCTTGCAGCTTGGCGCTTTCGAAGAAAAGCCGGAGACGCGGAAAAGCTGCAAAGCCGAA  
GCAGCCGGAGGCCAGAGTGAAGGAAGCAAGCAGACAGACCCCTGCTCCCGAGGCCACCCGCGCG  
CCTGTGGAACAGACGCCAGATCGCCCAATCTCGAAGCCGCCAATGACGGCTCCAAGCGCAGCC  
CGGCGATGATCCTGAAATCGCTGGAAGGCGGCTCCATCGGCGGTGCATTTGCGCAACGCCACGAT  
CATGTGCGGTGATCTGGGCACTCGGCGGCCTTGGCATCGCACATCTCCTTTACGGCAATGCGCTG  
TGGAGTATCGGCTCGCTCGCCGATCTCACCGCGATCCCCGGCCTGATGGCGATCGTCGTCGGCA  
TCCTCGTTCCCGTCATGCTGTTCTTCGCCTTCGCGATCATGATGGCGCGTGCCCGCGATCTGCG  
CAACGCTGCCCGCTCGATGGCCGAAGTTGCCCTTCGCCTTGCAGAACCGGAAACGGTAGCGTCC  
GACCGCATCATGTCCGTGCGCAAGCGGTTTCGCCGGAAGTTTCGGCCATGAATGACGGTATCG  
AGCGCACCATTGCCCGTGCAGCGAACTCGAAACCCTCGTGCATTCGAAGTCAACGCGCTTGA  
GCGCAGCTATGCCGACAACGAATTGCGCGTGCAGCCTCGTGCAGGAACTGACCGCCGAGCGC  
GACGCCATCGTCAACCATGCCGAGCGCATCCGCTCCTCCATTGTTCGGCGCGCAGGAACAGATCA  
AGGAAGAACTGTCCATCGTTCGGCGAAGAGCTTTCGATGCGGATCGCCACGACCGGTGAAGCTTT  
CGCCTCGATGATCGATACGCGCTCGGCCGCGCTGCTCGAAAATCGCGGGCCTCGACCGAAGCG  
ATGGGTAGCCTGATCGCCGCCAAGACAGAAAACCTGCTGCAGGCGCTGAACTCCTCCGCTCGA  
CGATATCAAACGAATTTGACATGCGCCTGCATAACCTCACGTGACGCTGGACGAGCGCGGTGA  
AGTGCTGCTGGAGCGTTTCGCGATCCATGCATCGACGCTGGATAGCGGTGTGGAAAGTCTCAAC  
AGCGCGCTTGAGGAGCGCACCCGCCAGCTCAACGAGACGCTGTCCGCGCGCTCCCTGGAAGTCA  
ACCGCAATATCGAACGCGGCCAGCAGGTCATCGGCGGTTTCGCTGGATACGGTTCCTCGACAAGCT  
GTCCACGACGCTTGAAGAAAAGGGCCTCTCCTTCCGCCAGAGCCTGCAGAGCACGGCCGACGAT  
GCGATCATGGATCTCGATCTTCGCTCCGGCCTTTACGAAGAGCGCATGCAAGCGACGGTTCGGCC  
AGGTCAATTCGGCCTTCGACGAGCATGTGGCGCAATTTGCCAGCGCCTTCGACCAGCGCGCCGG  
CAGCCTCGACAGCAAGCTGATGGAAAGCCTCGCACGGATCAACGAAACCCTTGCCGGCGGCTCC  
GAAGCCCTCGACACCATTCTGACAAGCGGTCTTGAGCGCATCGGCAGCACCATGACCGACCAGT  
CTCTGGCGCTCGCTACCGCGCTGGGCACGGGTGAGGAAATGCTGGAAAACGCACTCGAAAGCCG  
GACCCAGGCCTTCAGCGACGCCATCGGCCAGCGCACCCGCCGAAATTACAGATGCCTTCACCAAT  
TCGCACGCGAAGATCGATAACGTTCTGGCGGAAACGCAGCAACGCCCTGTTTCGGCGCGCTTTCGG  
CCAGCCAGGACCGTTTCGACGAAGCACTCGCCAGCCGTTCTCTCGCCATTACCGGCTCGGTTTC  
CGCACGGCCGAACACCTTGCCGCGATGCTCGATGAACGCGCCGCGCGATCAACAGCGTCGTT  
GCCGACGTCGAACGTCGCCTGACGGAGACGCTCGAAACCCGCGCCGACGCCATCACCGGCGCTG  
TCTCCGGCATCGAGGACCGCATCTCCGACACGCTGGAAAGCCGCACGGCTGCCCTGCATGATGT  
CGTTTCCGGCGCGGAGAGCCGCATCGCCGATACGCTTGACGGCCGACCCGCCGCTCTTTCCAGC  
GCGATTTCCGGTGTTCGAGGAACGTATTGCCGACACGATGGACAGCCGCACGCTGTCACTCGACA  
TGACCTTCGCCAATGTTGAGGAACGGCTTTCCGAGACGCTCGACAACCGCACCTCCGCTCTGAC  
AGGCATTGTTGCAAGCGCCGAAGAAAAGATCGCCGGGGCGCTCGATAGCCGCACGGCCACCTTC  
GGTGACGTGGTTGCCGGTGTGAAACCCGTATCGCCGAAACGCTTGATGGCCGACCCGAGCGC  
TCAATGCCGTGGTTTCCGGTGGCGAGGAGCGCATCGCGGATGCTCTCGACAGCCGTACCATGGC

GCTCGACATGACCTTCTCCGGCGCCGAGGAAAAGATCGCCGAAGCGCTCGACACGCGCACCGCA  
GCCCTTGGTGAGCTGGTGGCAAGCGCCGAGACCCGTATTGCCGGCGCGCTCGACAGCCGCACGG  
ATTCGCTGAAAACCGTCGTTTCCGGCGCGGAAGAGCGGATCACCGATGTGCTCGACAGCCGCAC  
CATGGCGCTCGACATGAGCTTCTCCGGCGTCGAGGAAAAGATCACCGATATTCTCGATGGCCGC  
ACCGCCGCGCTGAAGAGCGCCGTTGCCGGTGTGAGGACCGCATTGCCGGTGCCTCGACAGCC  
GTACTGCTGCCCTTCCGGCATCGTGTGAGGCGCGAAGAACGCATCGCCGAGGCGCTCGATAG  
CCGCACCTGGCACTCGACATGACAATTTCCGGTGTGCAAGAGCGGATCGCCGAGGCGATGGAT  
GCGAGAGCCTCGTCGCTTTCGCTTGCCGCTGCCGGCGTCGGCCAGCGTCTCGAAGCCACGGCCT  
TCACGCTTGAGAATGCCCTTGCCAGCGGTCACGAGCGGCTGGAAACCATGCTTGGCTCGCAGGC  
GGAGCGCATTGCCGGTTCGCTGGAGCGCAATAGCGGCTGATCGAACAGAGCGTTTCCGGTGCC  
GCCAACCGCATCGAAAACGTTGTGGAAGATGGCAGCAGCCGTTTTCGCGAGACGGTGGAAGAAG  
GCGTCTCGCGCTCGAAAACAATCTGTGCAATCGCACGAAGAAATCCGCACCGCGCTTGACCA  
GCGCCAGGCGGACCTTGCCGCGACGCTCAGCTCCGCCACCACCCAGATGGGGCAGATGCTCTCC  
GAGCAGGCGATGATGATCGGCACCACTGTGCCTCCAGCGCCAGCATGCTCGAATTGTCGCTCG  
AAACCCAGCAGGACACGTTGCAGAAGGCAATCGATGGCAGTGTGCAACGCTGGAGGCCCGTCT  
TCGCAACAGCGCCGGCGACATTGCCGTCAAGATCGGTGAAGCCGCCCGCAAATCGGCGGTGCG  
ACCGACGCCCTCTCCACTCGTATTGAAACCTCAATCGGCAATGTCACCACCCGTCTCGACGAGA  
CCGGCGCCCGCATCGAGACCTCTCTCGACGCCCTCCAGACCCGCGTCGGCGGTGATCTGGCCAA  
CGTCAACAATTTCGATCGAAGATGCCGGCCGCCGCTTCGCGGACGCGCTGGAAGACAAGACGGCC  
GTGTTCCGCCGACCAGCGACGAGGCCGCCGAACGCATCACCGCATCTGGACGAGCAGACGA  
CCCGCGTCGCAGACACGTTCGAAAACCGCACCAGCCGTCTGGCTGAAACCTTTGATGCCGGCAC  
GGCCCGTATCGACGAACGCCCTCGGCACCATGGACCAGGCGCCCTGACCATCGGTCTCGAAAATGTC  
AACCGCACCATCGAAGGCAAGGCGAGCGATCTCGCCGTGAGCCTGCGCGGCGCCGTTGTCTCCG  
CCACCCAGAACATCGGCGACGAAGCGGCTCGCTCCTCTGCCCTGCTCGAAAGTCCGGCTCGGA  
ATTTGCCGAACAGGTGCAGGCGCAGAACGAGGCCCTCACCAAGGCCATCGAGGAACGTTCCGGC  
GAGATCGTCACTCGCATCTCCGATGCCAGACCCGTCTTCCGGCCAGGCTGCTGCCGTGCGCG  
AGACCTTCTCCGAAGCGGGCAACATCATCGTCAACAAGGTGGCCGAAGCTGAAGCCGTCGTCCG  
CTCCAGGTCCGGCTCATCTCGGAGACACTGACGAGTGTGCAATCCGCCCTCGATGCACGCGGC  
GAATCGATCCGCTCGGCGCTTGATAACCGCACCCGCGAACTCAACTCGATGCTGGCCAGCCGTT  
CTGCCGAACGTGTCGCGCTGATCGAGGAGAAGGCGAAACCGGTCGTCGAGGAATATGCCACCAT  
CGGCCGGGAAGCCGCCGAAAAGATCGTTTCCGCCGCCAGCAGAGCGCAGAGCTTCTGTGCGAG  
AGCAACAGCGGCATGGTTCGGAATGGTGGAAACAGGCGATCAGCGATTACGCCGCCGCCGGAACGG  
ATGCAGCAAGCAAACCTCGTCGCCGCCACCCGCCAGAGCACCGACATGCTGTGCGAAACCCATA  
GGCCATGGCGGACGCCGTCGAACAGGGTATCGACAAATATGCCCGCTCGGGCAGCGATGCCGCC  
AACAAACCTCGTCGCAGCCACACGCCAGAGCACGGATATGCTGTGCGAGACCCATAACAGCATGG  
CCGAGATCGTTGAGCAGTCGGCGACCAACTTCAACGCCGCCGTCGAGCGCGCCGCACAGGGCTT  
CGGCGCGCAGATGAAGCGCTGAACGCCTCCGCGACCCGCTTCTCGGAATCCGCCCTCGCAGGCT  
GCCGACATGGTCTCGAGCTCCAGCCGTCTGCTCGAAGGAAAGATCGACCCTGTGTCGAATATTT  
CCGGCCAGACGCTGGCTCAGGTCGCCGGCATCGTTGGCCGCTTCGAGGAACATTCGAAGGTGCT  
GAGCCAGGCGTCCGAACACTCAACGCCGCACAGTCGAGCCTCGTCGGAACGCTGGAAGAACGT  
CAGGATGCGCTTTCGAGCCTGTGCGGTCGGCCTCGTCAAGCGTTCGGAAGAAATCGAAACCGCCA  
TGCGCAACGTCGTCGGCGTCGTGAAAACACCCCTCAACGAGGCCGAGGAGCGTTCACAGAACGT  
CGGGGTAATCTGCGTGACAATCTGCAGGCCTCCTTCTCCGATATCGGCCGCTCGCTCGACGAG  
ACCGAACAGCGTGCCTGTTCCGGCGGCACAGACCATGCCGGGCGCCTTGCTGTCTGCCGGTCAGG  
ATGCCAGCCGCTCGATCGAAAGCACGCTTTCGACGCGCAGAAATATTCGATGAGCTGGTCAA  
CCGCTGCGTGGTGGCGTCGAATCCTCGTGTGCGGAAGTCGACAATCTTCTCGGTAGTGCCCTCG  
GAGAAATCCAATGCCGCCGCCCAACCTCAAGGAAACGCTGCGTCAGGCCGTCGAGGAGGCCG  
TTAGCCGCTTTGCCGGTGCAGACAGACGAAATCCGCCGTTCCAGCCACGATATCCGCCGCGAGCT

GGATGCGACCCGCGCCGAAGTGAAGCGTGGCGCATTTCGACCTGCCGGAAGAAGCCAAGGAAAGT  
 GCGGCCGCCATGCGCCGCGCCGTTTCCGAACAGATCAAGGCCCTGCAGGATATTTCCCAACTCG  
 TCGGTTCGCTCGACCCACCAGATGGAAGTGTCCGAACCGTTCGCCCGTGCATCGCCGCAACCCA  
 GCCGGCCGAGAACGCCGCGTTCGAGCCGCGTCCGCAGCCGGCGGCAGCCGCTCCGGTGCAGCAG  
 CGCCCGGCACAGCCGAGCCTGCCCTGCATTGCGTGGCACAACCTGCCGCTTGAGAACCCTCAGG  
 TCGAAAACCGTCAGGCACCCGCCCGGGCGCAGCCGGTTCGCAACCAACCCGGCCGGACGCCGGGA  
 AGAAGGCGGCGGCTGGATCAGCGATCTGCTACGCGGCGCGTCCCAGGAGACGCCAGCAGCATCT  
 ACACCGCGCGCCAGCACTGAGCAGCAGCCACCCGTGCGGGCCGACACCCGCAATCCCCGGCACA  
 TGGTGGAAATCGCTGAATTCACCTCTCGGTTCGATATCGCCCGCGCCATCGATCACGATGCCTCCGT  
 GGAAGTGTGGCGCCGCTATCAGCGCGGCGAGCGCGACGTCTTCACACGTCGCCTCTACACGCTG  
 AAGGGCCAGACGACGTTTGACGAGATCAAGCGCAAATACGAACGCGAAGCGGAATTCCGCACCG  
 CCGTGGACCGCTACATCACCGATTTTCGAGAAGCTGCTCGCCGACGTGGCCCGCACCAGCCGCGA  
 CCGGAGCGTCACCCAGTCCTACCTCACCTCCGATACCGGCAAGGTCTATACGATGCTTGCCCAT  
 GCGGCGGGCCGGTTTAATTGA

**Figure S6. *gpr* deletion strategy.** Atu1349 partial protein coding sequence in blue. Atu1348 (*GPR*) coding sequence in red. Intergenic region in black **bold**. Deleted sequence (underlined) comprises 238 bp upstream of the *gpr*-ATG and the first 2140 bp of the coding sequence for Atu1348 (total *gpr* protein coding sequence is 6345 bp).

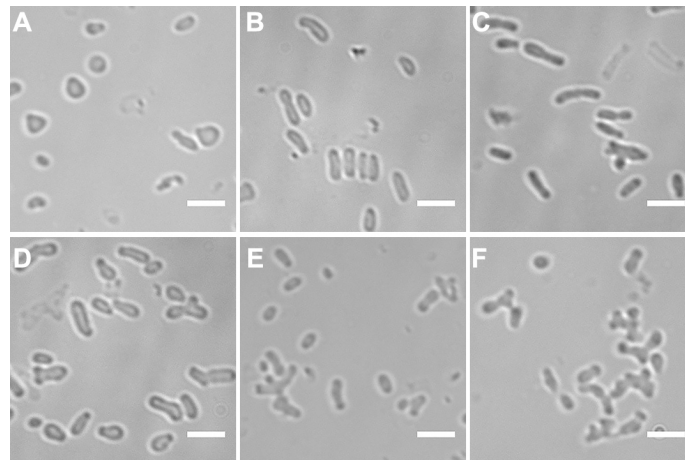

**Figure S7.  $\Delta gpr$  complementation.** Unipolar growth and cell division were restored in  $\Delta gpr$  following introduction of a plasmid carrying WT *gpr* under the control of the *lac* promoter ( $P_{lac}::gpr$  (pSRKGm)). Cells were grown for 24 hours prior to imaging in the IPTG concentration indicated. A) 0  $\mu$ M IPTG, B) 25  $\mu$ M IPTG, C) 50  $\mu$ M IPTG, D) 100  $\mu$ M IPTG, E) 250  $\mu$ M IPTG, and F) 500  $\mu$ M IPTG. Scale bar = 3  $\mu$ m.



**Supplementary Table 1.** Apolipoprotein domains (Family PF01442) in GPR identified by [www.pfam.xfam.org](http://www.pfam.xfam.org) (2). <sup>a</sup>amino acid number

| <b>Position in GPR<sup>a</sup></b> | <b>Domain Length<br/>(amino acids)</b> | <b>e-value</b>       |
|------------------------------------|----------------------------------------|----------------------|
| 290-450                            | 161                                    | $9.7 \times 10^{-1}$ |
| 323-523                            | 201                                    | $3.6 \times 10^{-1}$ |
| 416-612                            | 197                                    | $1.5 \times 10^{-2}$ |
| 495-718                            | 224                                    | $7.3 \times 10^{-3}$ |
| 625-824                            | 201                                    | $7.2 \times 10^{-5}$ |
| 821-1008                           | 188                                    | $5.5 \times 10^{-2}$ |
| 937-1126                           | 190                                    | $7 \times 10^{-6}$   |
| 1115-1338                          | 224                                    | $1.9 \times 10^{-4}$ |
| 1291-1439                          | 149                                    | 13                   |
| 1335-1542                          | 208                                    | $6.5 \times 10^{-4}$ |
| 1583-1783                          | 201                                    | $5.3 \times 10^{-4}$ |
| 1784-1878                          | 95                                     | 290                  |

**Table S2.** Strains and plasmids used in this study.

| <b>Strains</b>    | <b>Relevant genotype and features</b>                                                                                                                                    | <b>Source</b> |
|-------------------|--------------------------------------------------------------------------------------------------------------------------------------------------------------------------|---------------|
| XL1 Blue E. coli  | cloning strain, endA1 gyrA96(nal <sup>R</sup> ) thi-1 recA1 relA1 lac glnV44 F'[::Tn10 proAB+ lacIq Δ(lacZ)M15] hsdR17(rKmK+), Tet <sup>R</sup>                          | Lab stock     |
| C58               | wild-type <i>A. tumefaciens</i> strain C58                                                                                                                               | Lab stock     |
| A185              | C58 carrying pJZ251                                                                                                                                                      | This work     |
| A187              | C58 carrying pJZ253                                                                                                                                                      | This work     |
| A202              | C58 carrying pJZ253 and pJZ269                                                                                                                                           | This work     |
| A212              | C58 with the native <i>gpr</i> ribosome binding (RBS) site substituted with a riboswitch, referred to as RS:: <i>gpr</i> in text                                         | This work     |
| A248              | C58 with a deletion of 2378bp including 238bp upstream of the <i>gpr</i> ATG and the first 2140bp of the <i>gpr</i> coding sequence, referred to as Δ <i>gpr</i> in text | This work     |
| A239              | A212 carrying pJZ253                                                                                                                                                     | This work     |
| A253              | A248 carrying pJZ280                                                                                                                                                     | This work     |
| A256              | A212 carrying pRG001                                                                                                                                                     | This work     |
| RESJ001           | C58 carrying pJZ253 and pTC077                                                                                                                                           | This work     |
| <b>Plasmids</b>   | <b>Relevant genes and construction information</b>                                                                                                                       | <b>Source</b> |
| pSRKGm            | Broad host-range, <i>lacI</i> , gentamycin <sup>R</sup>                                                                                                                  | (3)           |
| pSRKKm            | Broad host-range, <i>lacI</i> , kanamycin <sup>R</sup>                                                                                                                   | (3)           |
| pBluescript II SK | Phagemid, carbenicillin <sup>R</sup>                                                                                                                                     | Stratagene    |
| pJZ156            | pBSKII+ with <i>sacB</i> , carbenicillin <sup>R</sup>                                                                                                                    | (4)           |
| pJZ210            | pSRKGm with P <sub>lac</sub> :: <i>gfp</i>                                                                                                                               | This work     |
| pJZ251            | pSRKGm with P <sub>lac</sub> :: <i>gpr</i> <sub>At</sub> - <i>gfp</i>                                                                                                    | This work     |



|        |                                                                                                                                       |           |
|--------|---------------------------------------------------------------------------------------------------------------------------------------|-----------|
| pJZ253 | pSRKGm with $P_{lac}::gfp-gpr$                                                                                                        | This work |
| pJZ269 | pSRKKm with $P_{lac}::popZ_{At}-rfp$                                                                                                  | This work |
| pJZ274 | pJZ156 carrying 2kb sequence homologous to C58 genomic DNA in which the native <i>gpr</i> RBS is replaced with a riboswitch (Fig. S8) | This work |
| pJZ280 | pSRKGm with $P_{lac}::gpr$                                                                                                            | This work |
| pJZ298 | pJZ156 carrying 1kb homologous to C58 genomic DNA on either side of the sequence to be deleted (Fig. S6)                              | This work |
| pRG001 | pSRKGm with $P_{lac}::popZ_{At}-gfp$                                                                                                  | (5)       |
| pTC077 | pDW029 with $P_{lac}::ftsZ-rfp$ , streptomycin/spectinomycin <sup>R</sup>                                                             | (6)       |

## SUPPLEMENTAL REFERENCES

1. Kelley LA, Mezulis S, Yates CM, Wass MN, Sternberg MJE (2015) The Phyre2 web portal for protein modeling, prediction and analysis. *Nature Protocols* 10(6):845–858.
2. El-Gebali S, et al. (2019) The Pfam protein families database in 2019. *Nucleic Acids Res* 47(D1):D427–D432.
3. Khan SR, Gaines J, Roop RM, Farrand SK (2008) Broad-host-range expression vectors with tightly regulated promoters and their use to examine the influence of TraR and TraM expression on Ti plasmid quorum sensing. *Appl Env Microbiol* 74(16):5053–5062.
4. Anderson-Furgeson JC, Zupan JR, Grangeon R, Zambryski PC (2016) Loss of PodJ in *Agrobacterium tumefaciens* leads to ectopic polar growth, branching, and reduced cell division. *J Bacteriol* 198(13):1883–1891.
5. Grangeon R, Zupan JR, Anderson-Furgeson J, Zambryski PC (2015) PopZ identifies the new pole, and PodJ identifies the old pole during polar growth in *Agrobacterium tumefaciens*. *Proc Natl Acad Sci USA* 112(37):11666–11671.

6. Cameron TA, Anderson-Furgeson J, Zupan JR, Zik JJ, Zambryski PC (2014) Peptidoglycan synthesis machinery in *Agrobacterium tumefaciens* during unipolar growth and cell division. *MBio* 5(3):e01219–14.

## Supplemental Movies

**Movie S1, S2, S3, S4.** *Agrobacterium* cells expressing GFP-GPR display a ring of foci just below the growth pole. GFP-GPR localization in 4 cells shown by rotational animation of 3-dimensional renderings from images obtained with structured illumination superresolution microscopy.

**Movie S5.** *Agrobacterium* cells expressing GFP-GPR and PopZ-RFP display a ring of green foci just below the growth pole and a single red focus. Localization shown in rotational animation of 3-dimensional rendering from images obtained with structured illumination superresolution microscopy.

**Movie S6.** Time lapse of *Agrobacterium* cell expressing GFP-GPR shown in Fig. 4.

**Movie S7.** Time lapse of 2 *Agrobacterium* cells expressing GFP-GPR show variability in persistence of GPR at old pole.

**Movie S8.** Time lapse of  $\Delta gpr$  cell in Fig. 5.

**Movie S9.**  $\Delta gpr$  cell division produces quartet of cells.
